# Supplementary material for: First Detection of Highly Pathogenic Avian Influenza Virus in Norway
Source: Research Square preprint supplement (doi:10.21203/rs.3.rs-139948/v1), 2021-01-07
Supplement: Supplementary file 1 [file 24bfe918c65a6faeb75985cb.xlsx]

## Sheet: Ark1
Sampling	Municipality	County	Species	Active/passive surveillance
2020-11-14	Klepp	Rogaland	Eurasian wigeon (Mareca penelope)	Active
2020-11-14	Klepp	Rogaland	Eurasian wigeon (Mareca penelope)	Active
2020-11-14	Klepp	Rogaland	Eurasian wigeon (Mareca penelope)	Active
2020-11-15	Klepp	Rogaland	Eurasian wigeon (Mareca penelope)	Active
2020-11-24	Sandnes	Rogaland	Pink-footed goose (Anser brachyrhynchus)*	Passive
2020-11-28	Klepp	Rogaland	Pink-footed goose (Anser brachyrhynchus)	Active
2020-11-30	Bergen	Vestland	Great black-backed gull (Larus marinus)	Passive
2020-11-30	Hå	Rogaland	Domestic turkey (Meleagris gallopavo f. domestica)	Passive
2020-12-02	Hå	Rogaland	Domestic fowl (Gallus gallus domesticus)	Passive
2020-12-02	Hå	Rogaland	Domestic fowl (Gallus gallus domesticus)	Passive
2020-12-02	Hå	Rogaland	Domestic fowl (Gallus gallus domesticus)	Passive
2020-12-03	Randaberg	Rogaland	Eurasian wigeon (Mareca penelope)	Passive
2020-12-10	Eigersund	Rogaland	European herring gull (Larus argentatus)	Passive
2020-12-17	Evje og Hornes	Agder	Barnacle goose (Branta leucopsis)	Passive
*Index case
